# Supplementary material for: Cobalt–metalloid alloys for electrochemical oxidation of 5-hydroxymethylfurfural as an alternative anode reaction in lieu of oxygen evolution during water splitting
Source: publisher site journal article supplement (doi:10.3762/bjoc.14.121), 2018-06-13
Supplement: Additional file 1 [file 1860-5397-14-121-S1.pdf]

**Supporting information**  
**for**  
**Cobalt–metalloid alloys for electrochemical**  
**oxidation of 5-hydroxymethylfurfural as an**  
**alternative anode reaction in lieu of oxygen**  
**evolution during water splitting**

Jonas Weidner<sup>1,§</sup>, Stefan Barwe<sup>1,§</sup>, Kirill Sliozberg<sup>1</sup>, Stefan Piontek<sup>2</sup>, Justus Masa<sup>1</sup>,  
Ulf-Peter Apfel<sup>2,3</sup> and Wolfgang Schuhmann<sup>1,\*</sup>

Address: <sup>1</sup>Analytical Chemistry – Center for Electrochemical Sciences (CES), Ruhr-Universität Bochum, Universitätsstraße 150, D-44780 Bochum, Germany,  
<sup>2</sup>Anorganische Chemie I, Ruhr-Universität Bochum, Universitätsstraße 150, D-44780 Bochum, Germany and <sup>3</sup>Fraunhofer UMSICHT, Osterfelder Straße 3, D-46047 Oberhausen, Germany

Email: Wolfgang Schuhmann - wolfgang.schuhmann@rub.de

\* Corresponding author

§Equally contributing authors

**Additional figures and chromatograms**

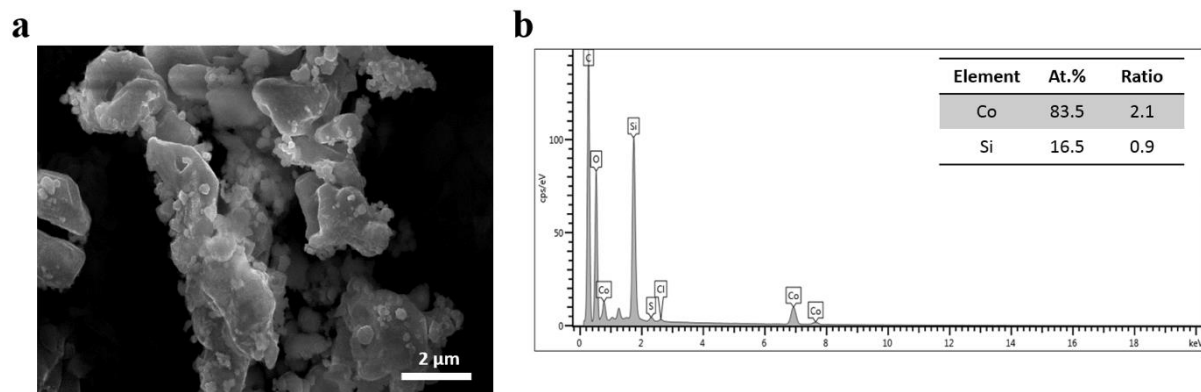

**Figure S1:** SEM (a) and EDS (b) of  $\text{Co}_2\text{Si}$ .

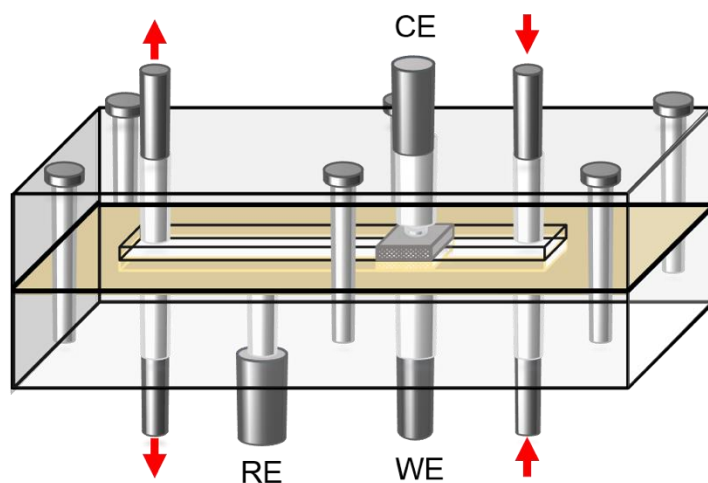

**Figure S2:** Schematic representation of the flow reactor.

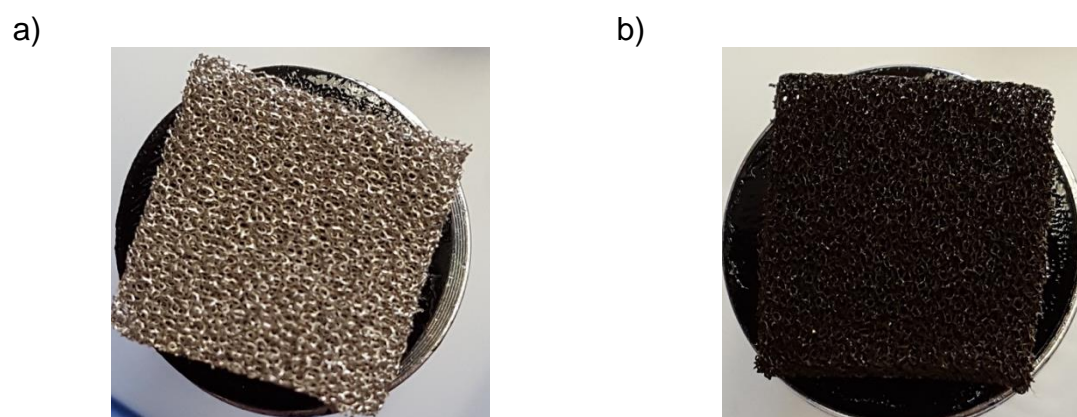

**Figure S3:** Photographs of bare (a) and CoB-modified (b) nickel foam.

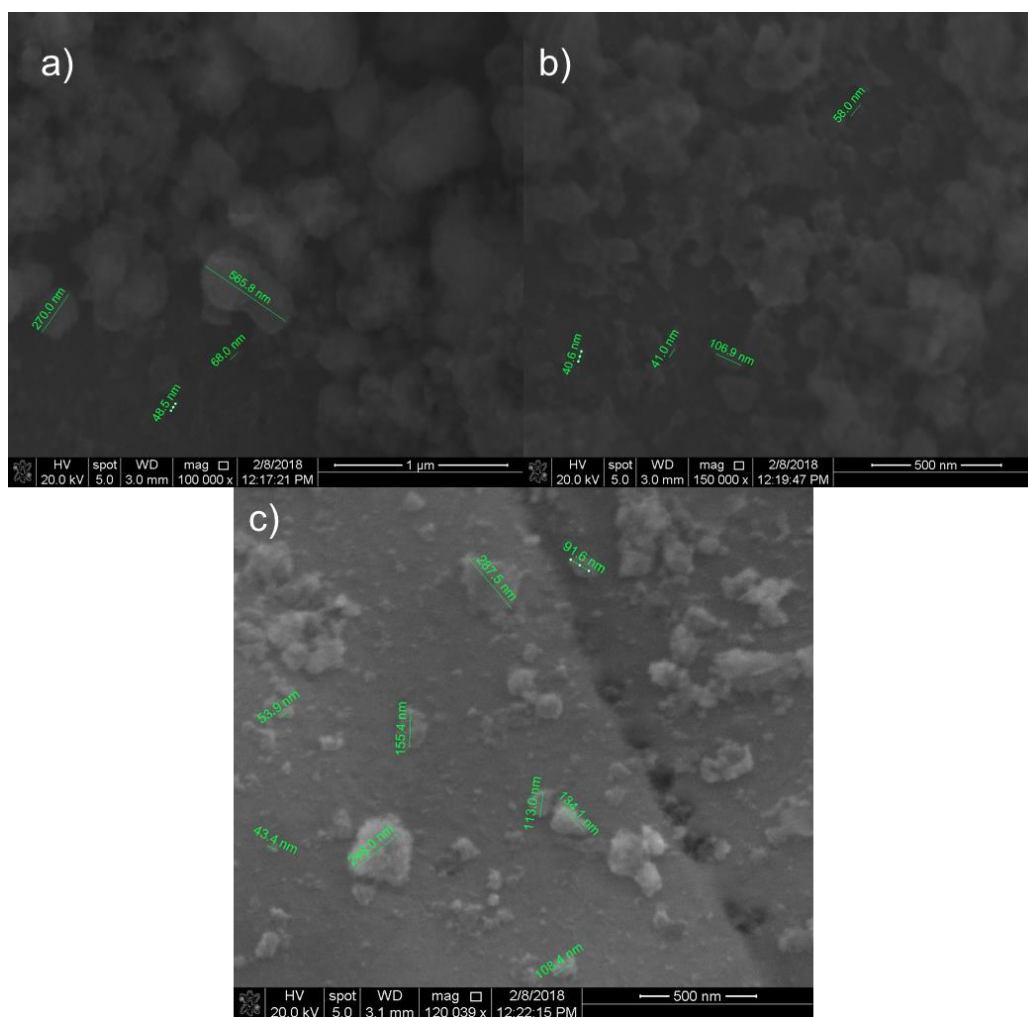

**Figure S4:** SEM images of CoB-modified nickel foam.

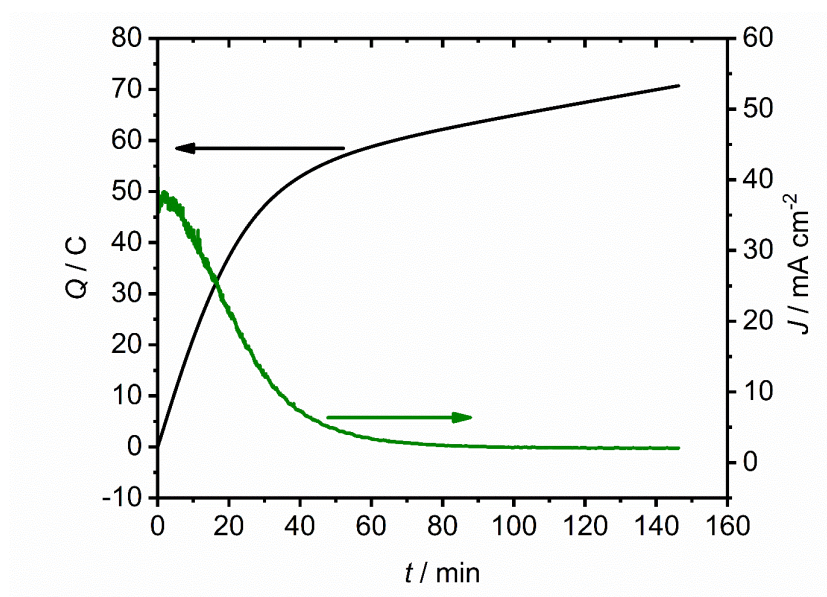

**Figure S5:** Current vs. time and charge vs. time transients during constant potential HMF electrolysis at an applied potential of 1.45 V vs RHE.

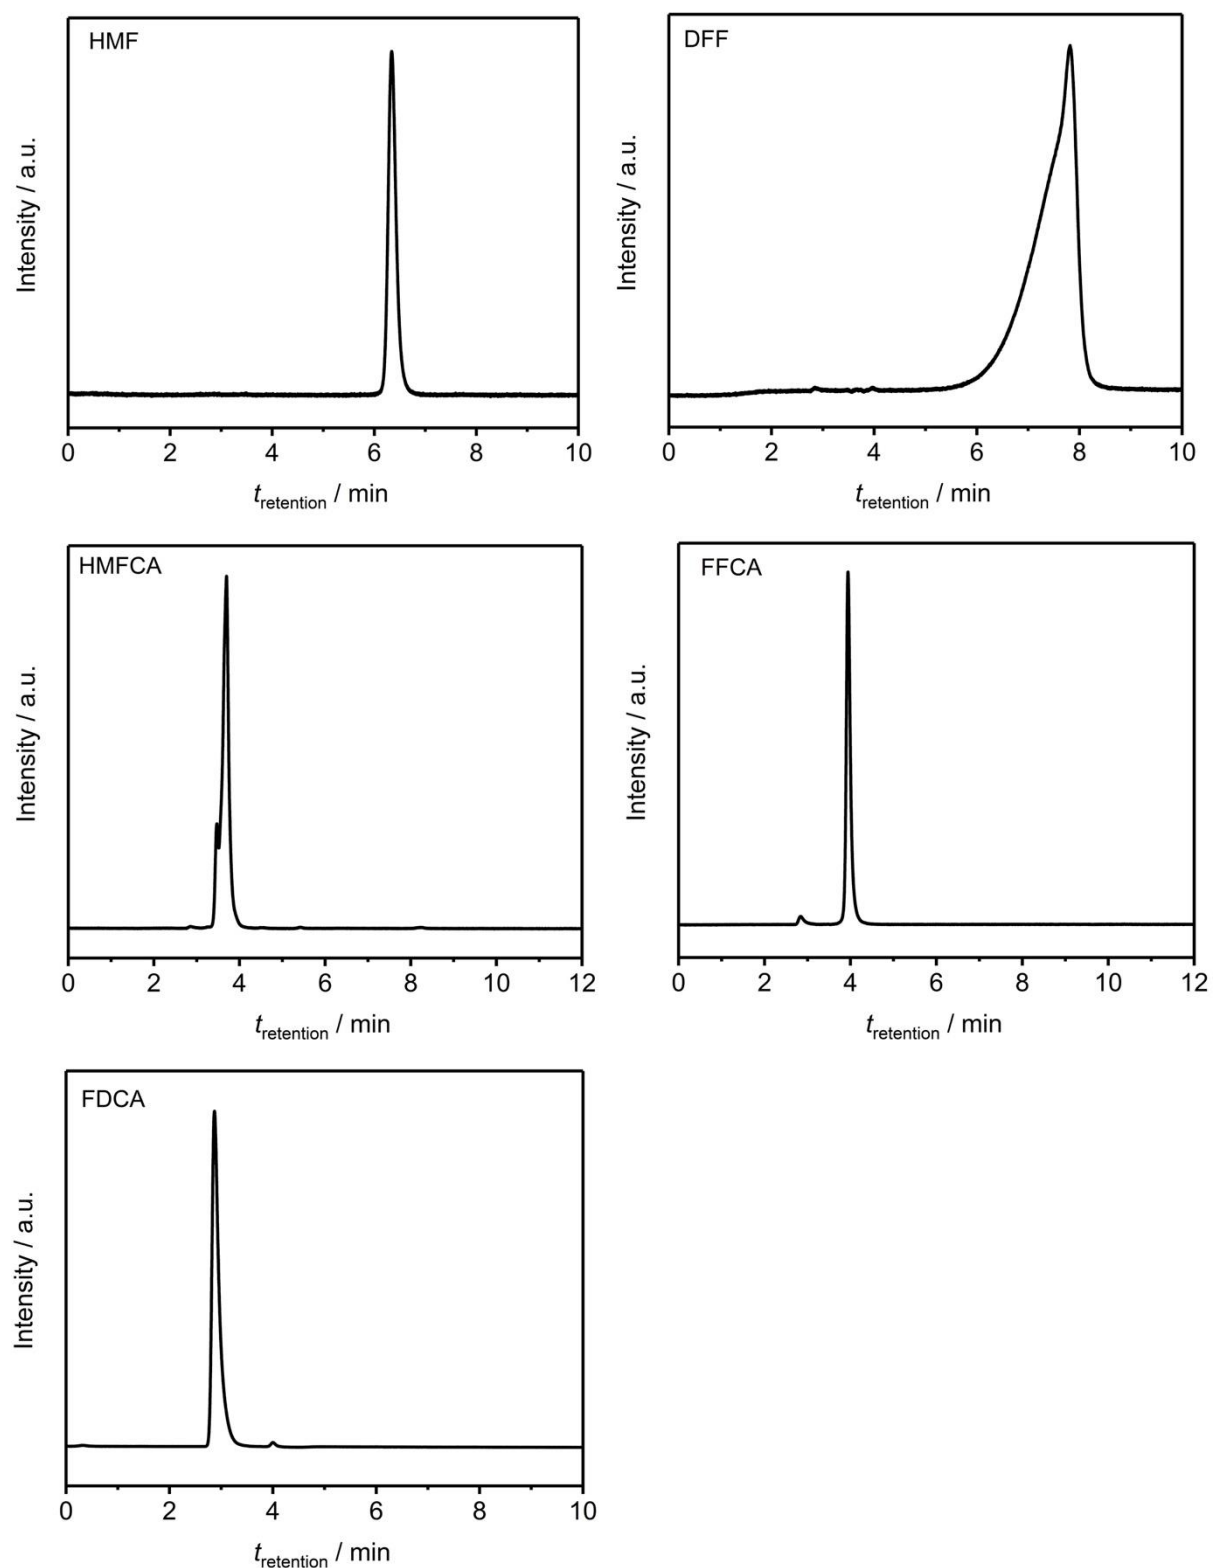

**Figure S6:** Reference HPLC chromatograms of pure compounds.

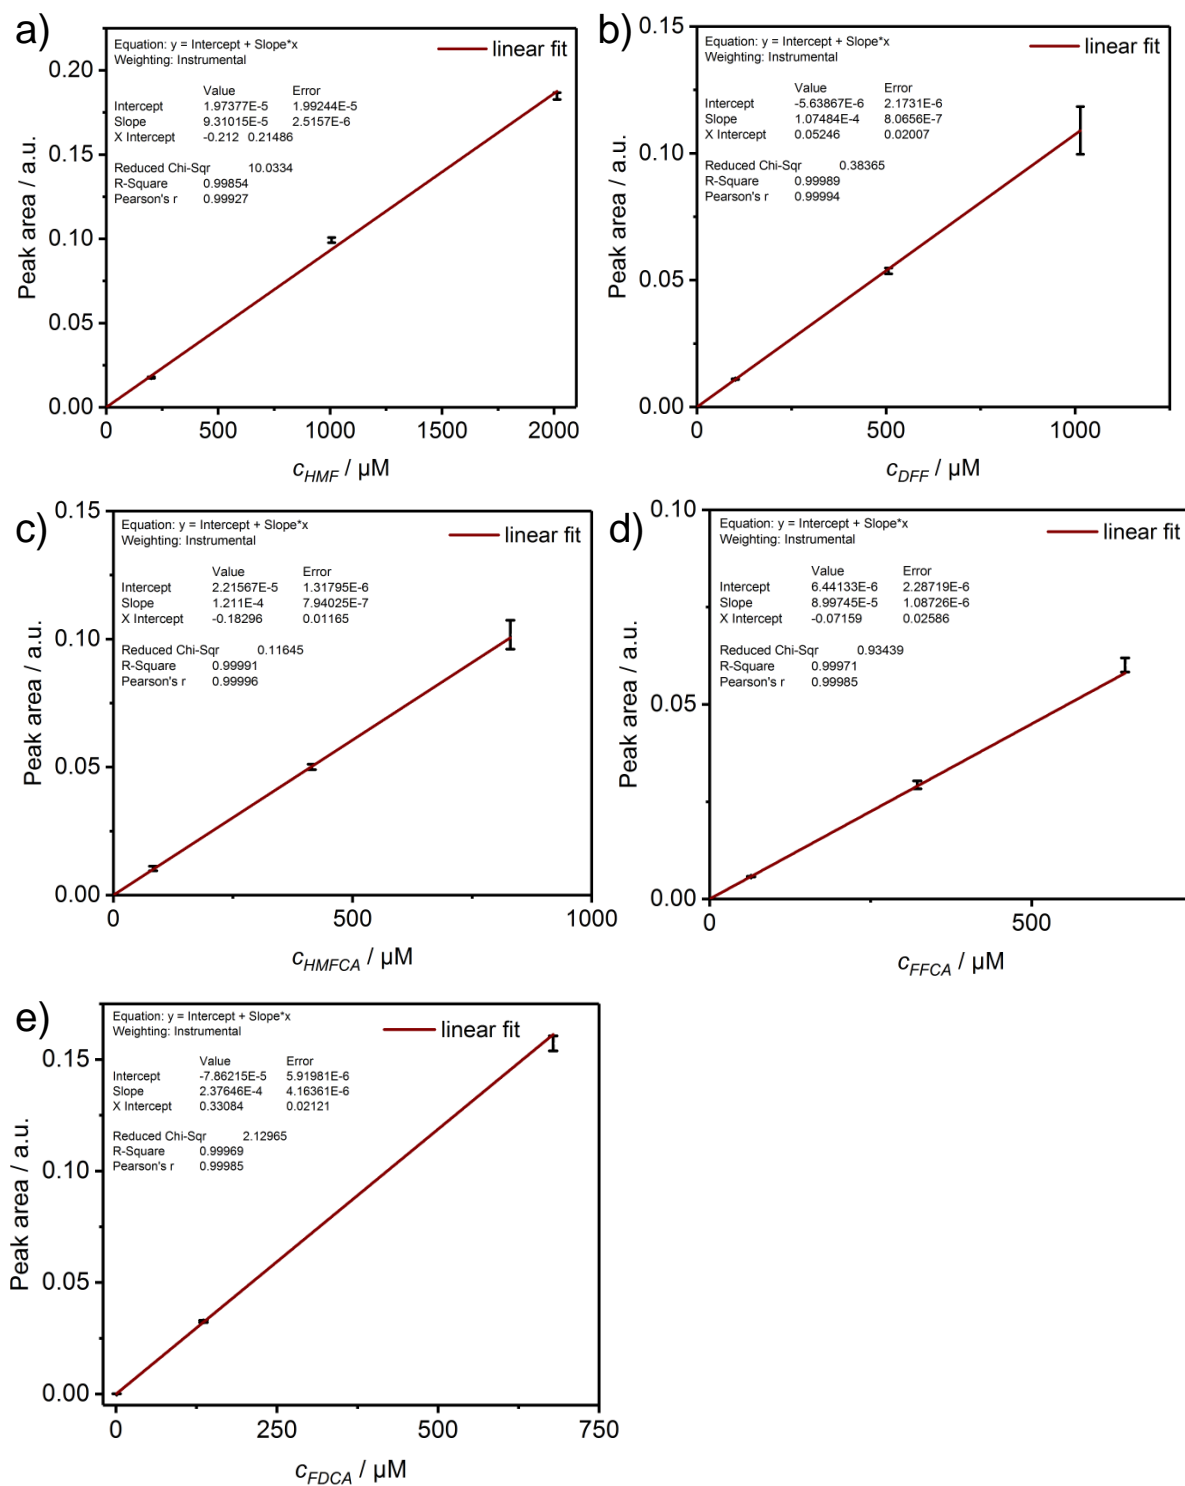

**Figure S7:** Calibration curves for HMF (a), DFF (b), HMFCFA (c), FFCA (d) FDCA (e).

Calibration was done by injecting 10  $\mu\text{L}$  of a solution of the pure compound with a predefined concentration dissolved in 490  $\mu\text{L}$  Milli Q water into the HPLC. The eluent (70 vol % 5 mM ammonium formate and 30 vol % methanol) was pumped with a flow rate of 0.5  $\text{mL min}^{-1}$ . For calibration, various compound concentrations were used and the peaks of the corresponding HPLC chromatogram were integrated. Plotting the peak area vs the concentration led to a linear correlation. From the linear fit

equation, the concentrations of the various reactants during electrolysis were calculated.

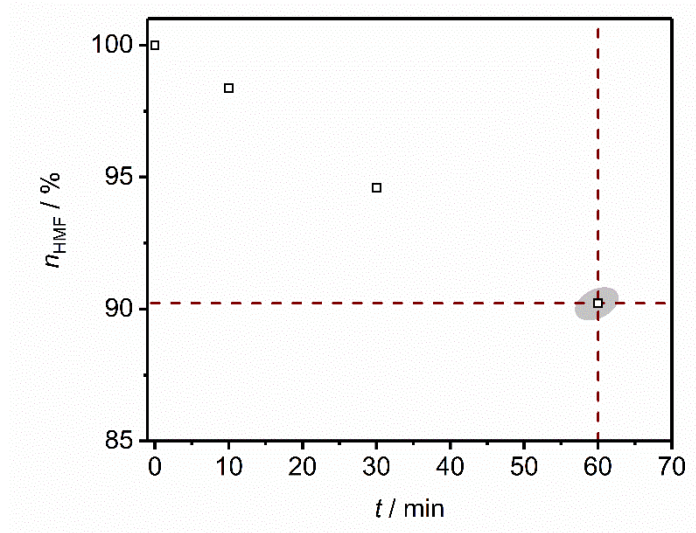

**Figure S8:** HMF decomposition in 1 M KOH.

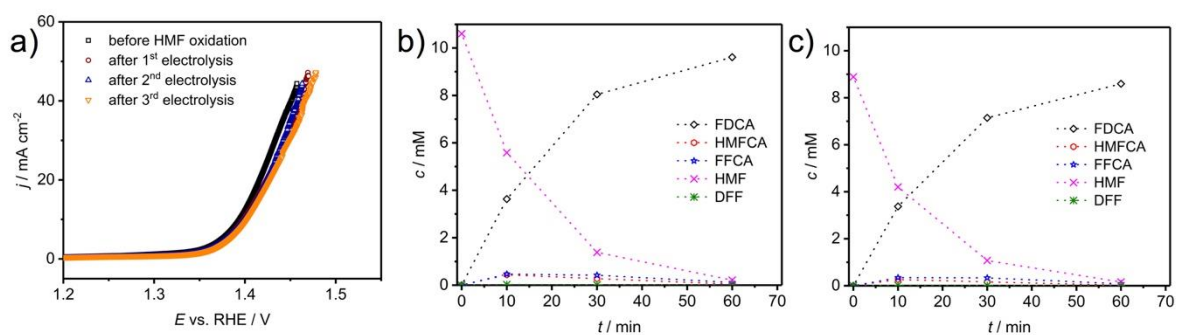

**Figure S9:** a) LSVs before HMF electrolysis and after each complete HMF oxidation cycle (10 mM HMF in 1 M KOH,  $2 \text{ mV s}^{-1}$ ,  $18 \text{ mL min}^{-1}$ ). Concentration vs time curves for HMF, HMFCFA, DFF, FFCA and FDCA of the second (b) and third (c) HMF electrolysis at 1.45 V vs RHE.

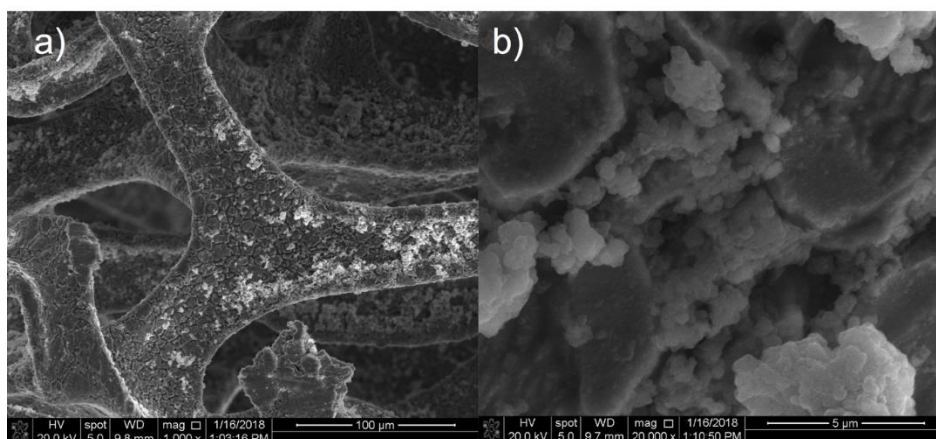

**Figure S10:** SEM micrographs of the CoB-modified nickel foam electrode after three complete cycles of HMF electrolysis at 1.45 V vs RHE with magnifications of 1000× (a) and 20000× (b).
